# Supplementary material
Source: Elsevier journal article supplement (https://www.sciencedirect.com/science/article/pii/S1575181318301384)
Supplement: mmc1 [file S1575181318301384:mmc1.pdf]

## Anexo

## Cuestionario PHEEM

| Preguntas                                                                                                                                   | Fuerte desacuerdo | Desacuerdo | Incierto | Acuerdo | Fuerte Acuerdo |
|---------------------------------------------------------------------------------------------------------------------------------------------|-------------------|------------|----------|---------|----------------|
| 1.Tengo un programa que provee información acerca de las horas de actividad clínica.                                                        |                   |            |          |         |                |
| 2. Mis instructores establecen expectativas claras.                                                                                         |                   |            |          |         |                |
| 3. Tengo tiempo educacional protegido en esta rotación clínica.                                                                             |                   |            |          |         |                |
| 4. Tuve un programa de introducción informativo.                                                                                            |                   |            |          |         |                |
| 5.Tengo el nivel apropiado de responsabilidad en esta rotación clínica.                                                                     |                   |            |          |         |                |
| 6.Tengo buena supervisión clínica en todo momento.                                                                                          |                   |            |          |         |                |
| 7.Hay racismo en esta rotación clínica.                                                                                                     |                   |            |          |         |                |
| 8.Tengo que realizar tareas inapropiadas a mi etapa de formación.                                                                           |                   |            |          |         |                |
| 9.Hay un manual informativo de la rotación clínica para los residentes.                                                                     |                   |            |          |         |                |
| 10. Mis instructores tienen buenas destrezas comunicacionales.                                                                              |                   |            |          |         |                |
| 11. Soy localizado o ubicado en mi teléfono celular de forma inapropiada.                                                                   |                   |            |          |         |                |
| 12.Existen las facilidades para participar en otras actividades docentes sin interferir con clases o pruebas de evaluación de otros cursos. |                   |            |          |         |                |
| 13. Hay discriminación por sexo en esta rotación clínica.                                                                                   |                   |            |          |         |                |
| 14. Tengo guías claras acerca de mis actividades clínicas en esta rotación clínica.                                                         |                   |            |          |         |                |
| 15.Mis instructores son entusiastas.                                                                                                        |                   |            |          |         |                |
| 16. Tengo buena colaboración con otros residentes de mi nivel.                                                                              |                   |            |          |         |                |
| 17.Mi horario de actividades clínicas es adecuado.                                                                                          |                   |            |          |         |                |
| 18. Tengo la oportunidad de ofrecer continuidad en el cuidado de los pacientes.                                                             |                   |            |          |         |                |
| 19.Tengo acceso adecuado a consejería.                                                                                                      |                   |            |          |         |                |
| 20. Esta rotación clínica (hospital/consultorio) tiene una buena calidad de espacios físicos para desarrollar actividades docentes.         |                   |            |          |         |                |
| 21. Hay acceso a un programa educacional relevante con objetivos explícitos para mis necesidades.                                           |                   |            |          |         |                |
| 22.Recibo retroalimentación ( <i>feedback</i> ) regularmente de parte de los docentes.                                                      |                   |            |          |         |                |
| 23. Mis instructores son bien organizados.                                                                                                  |                   |            |          |         |                |
| 24. Yo me siento físicamente seguro en el ambiente clínico (hospitalario/ambulatorio).                                                      |                   |            |          |         |                |
| 25. Hay una cultura de no culpar en esta rotación clínica.                                                                                  |                   |            |          |         |                |
| 26.Hay facilidades adecuadas para obtener comida y bebidas (cafetería).                                                                     |                   |            |          |         |                |
| 27.Tengo suficientes oportunidades de aprendizaje clínico para mis necesidades.                                                             |                   |            |          |         |                |
| 28. Mis instructores tienen buenas destrezas clínicas.                                                                                      |                   |            |          |         |                |
| 29.Aquí me siento parte de un equipo de trabajo.                                                                                            |                   |            |          |         |                |
| 30. Tengo oportunidades de adquirir los procedimientos prácticos apropiados para mi nivel.                                                  |                   |            |          |         |                |
| 31. Mis instructores son asequibles.                                                                                                        |                   |            |          |         |                |
| 32. Mi carga de trabajo en esta rotación clínica es adecuada.                                                                               |                   |            |          |         |                |
| 33. Los docentes utilizan las oportunidades de aprendizaje en forma efectiva.                                                               |                   |            |          |         |                |

|                                                                                                                      |  |  |  |  |  |
|----------------------------------------------------------------------------------------------------------------------|--|--|--|--|--|
| 34. El entrenamiento en esta rotación clínica me hace sentir preparado para ser (Pediatra).                          |  |  |  |  |  |
| 35. Mis instructores tienen buenas destrezas como mentores.                                                          |  |  |  |  |  |
| 36. Tengo tiempo de esparcimiento fuera de las actividades de esta rotación clínica.                                 |  |  |  |  |  |
| 37. Mis instructores me fomentan al aprendizaje independiente.                                                       |  |  |  |  |  |
| 38. Existen buenas oportunidades de consejería para residentes que fallan en esta rotación clínica.                  |  |  |  |  |  |
| 39. Los instructores me proveen buena retroalimentación ( <i>feedback</i> ) respecto a mis fortalezas y debilidades. |  |  |  |  |  |
| 40. Mis instructores promueven una atmósfera de mutuo respeto.                                                       |  |  |  |  |  |

Fuente: Roff et al (1997).

### Interpretación de los Puntajes del PHEEM

La evaluación del clima total tiene la siguiente interpretación:

0 a 48: muy pobre

41 a 80: con muchos problemas.

81 a 120: más positivo que negativos, con espacios para mejorar.

121 a 160: excelente.

La subescala de Autonomía tiene la siguiente interpretación:

Ítems 1,4,5,8,9,11,14,17,18,29,30,32,34,40.

0 a 14: muy pobre.

15 a 28: visión negativa del rol de cada uno.

29 a 42: percepción más positiva del rol de cada uno.

43 a 56: percepción excelente.

La subescala de Soporte Social tiene la siguiente interpretación

Ítems: 7,13,19,20,24,25,26,35,38.

0 a 11: no existe

12 a 22: no es un lugar placentero.

23 a 33: más pro que contras.

34 a 44: ambiente con buen soporte.

La subescala de Enseñanza tiene la siguiente interpretación:

Ítems: 2,3,6,10,12,15,21,22,23,27,28,31,33,37,39.

0 a 15: calidad muy pobre.

16 a 30: necesita revisión.

31 a 45: encaminado en la dirección correcta.

46 a 60: profesores modelos.

Los ítems 7,8, 11 y 13 puntúan en forma inversa.
